# Supplementary material
Source: PubMed Central journal article supplement (PMC5070504)
Supplement: supp_2015-0343_Supplemental_Figures.pdf [file supp_2015-0343_Supplemental_Figures.pdf]

Supplemental Figures – Shih et al.

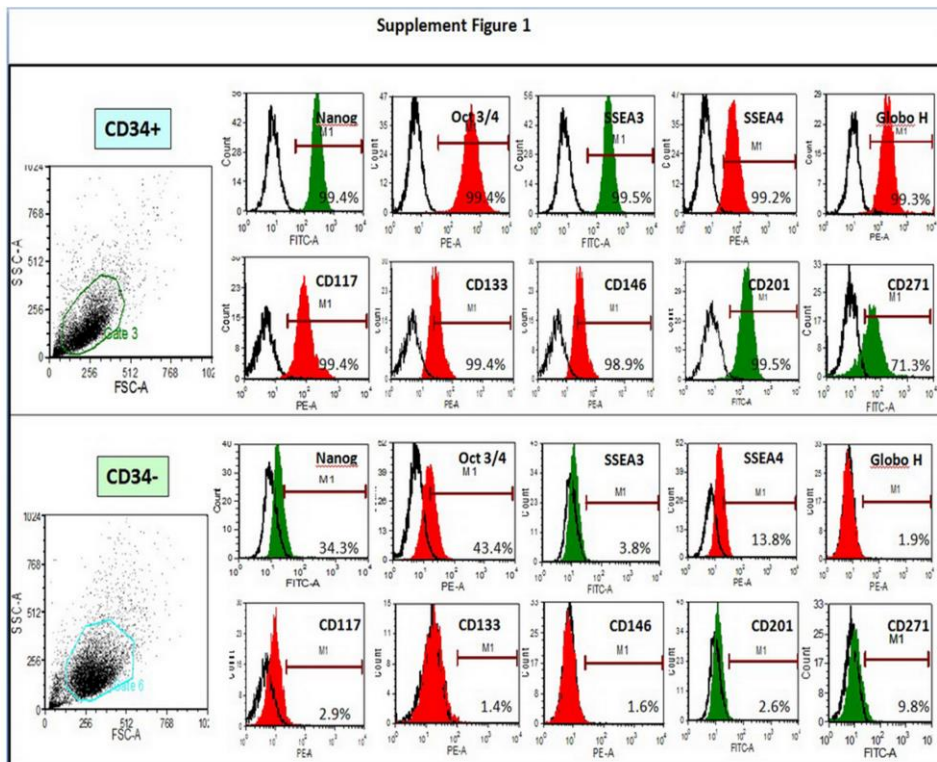

Cell Phenotype characterization of CD34+AMSPCs and CD34-AMSFs: comparisons of stem cell surface markers and embryonic antigens and transcription factors by FLOW Cytometry. CD34+: CD34+AMSPC; CD34-: CD34-AMSF

Supplement Figure 2

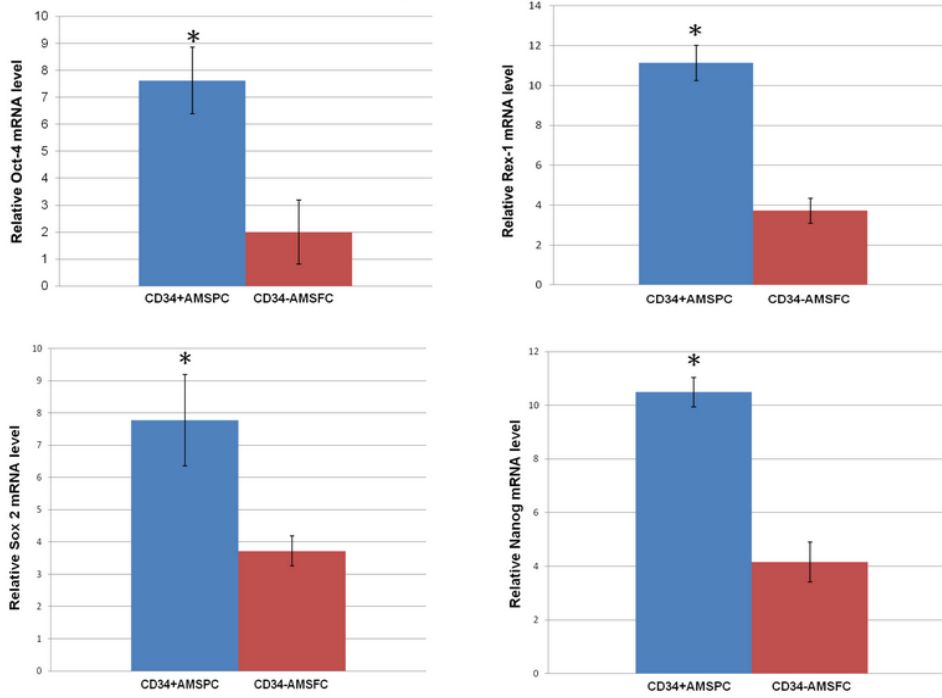

Comparison of transcription factors expression between CD34+AMSPC and CD34-AMSFC: RT-qPCR was performed to measure the relative expressions of Oct-4, rex-1, Sox-2 and Nanog using GAPDH as internal reference gene. Data were presented as mean $\pm$ SD. Unpaired Student's t-tests were used to analyze the data. P<0.05 was considered statistically significant.

### Supplement Figure 3

| Gene Name       | Primer Sequences (5' to 3')                                   |
|-----------------|---------------------------------------------------------------|
| GAPDH           | F: GGTGTGAACCATGAGAAGTATGA<br>R: GAGTCCTTCCACGATACCAAAG       |
| SOX-2           | F: GGAGAGTAAGAAACAGCATGG A<br>R: GTGGATGGGATTGGTGTCT          |
| REX-1           | F: ACTACCTCAGACAGATCATCCA<br>R: CTTCTCGAACCTTCCAGATCAC        |
| 4-Oct           | F: GACAACAATGAGAACCTTCAG<br>R: CGCCGGTTACAGAACCACAC           |
| NANOG           | F: CAGCTGTGTACTCAATGATAGATT<br>R: CAACTGGCCGAAGAATAGCAATGGTGT |
| PPAR $\gamma$ 1 | F: GCTCTAGAATGACCATGGTTGAC<br>R: ATAAGGTGGAGATGCAGGCTC        |
| GLUT4           | F: AGCAGCTCTCTGGCATCAAT<br>R: CAATGGAGACGTAGCACATG            |
| CBFA-1          | F: CTCACTACCACCTACCTG<br>R: TCAATATGGTCGCCAAACAGATTC          |
| AP              | F: TGAATATGCCCTGGAGC<br>R: TCACGTTGTCCTGTTTAG                 |
| Collagen II     | F: ATGATTCCCTCGGGCTCC<br>R: TCCCAGTTCTCCATCTCTG               |
| Aggrecan        | F: GCAGAGACGCATCTAGAAATT<br>R: GGTAAATGCAGGGAACATCAT          |

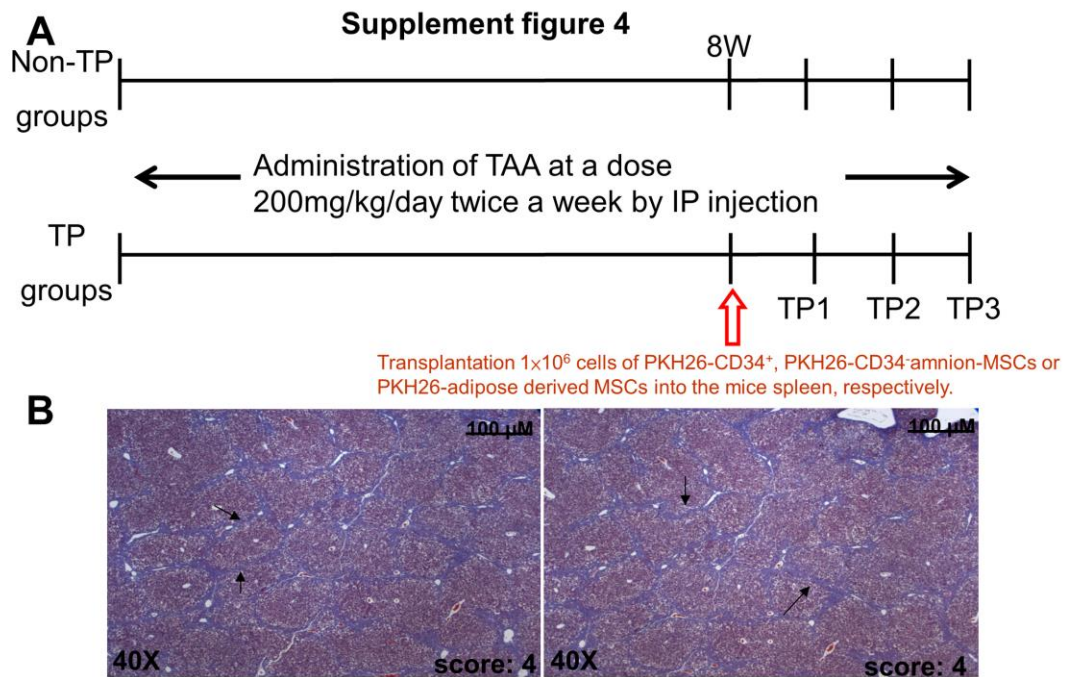

Liver fibrosis in the TAA-injured mice model: (A) Diagram of experimental design. (B) Histopathological analysis of the liver from TAA-injured mice by Masson's tri chrome staining. Liver fibrosis was observed in the bridging area after the 8-weeks treatment and at 1 week post transplantation. TP: transplantation; W: week; TP1: one week after transplantation; Score: fibrosis score. Scale Bar=100 $\mu$ m
